# Supplementary material for: Thioether complexes of WSCl4, WOCl4 and WSCl3 and evaluation of thiochloride complexes as CVD precursors for WS2 thin films
Source: Royal Society of Chemistry journal article supplement (doi:10.1039/d0dt00068j), 2020-01-01
Supplement: d0dt00068j1.pdf [file d0dt00068j1.pdf]

## ESI for

# Thioether complexes of $WCl_4$ , $WOCl_4$ and $WCl_3$ and evaluation of thiochloride complexes as CVD precursors for $WS_2$ thin films

Danielle E. Smith<sup>a</sup>, Victoria K. Greenacre<sup>a</sup>, Andrew L. Hector<sup>a</sup>, Ruomeng Huang<sup>b</sup>, William Levason<sup>a</sup>,  
Gillian Reid<sup>a\*</sup>, Fred Robinson<sup>a</sup> and Shibin Thomas<sup>a</sup>

<sup>a</sup> School of Chemistry, University of Southampton, Southampton SO17 1BJ, UK; email:

[G.Reid@soton.ac.uk](mailto:G.Reid@soton.ac.uk)

<sup>b</sup> School of Electronics and Computer Science, University of Southampton, Southampton SO17 1BJ, UK

## Contents

|                                                     |    |
|-----------------------------------------------------|----|
| Data for $[(WCl_4)_2\{MeS(CH_2)_2SMe\}]$ .....      | 2  |
| Data for $[(WCl_4)_2(MeS(CH_2)_3SMe)]$ .....        | 3  |
| Data for $[(WCl_4)_2\{^iPrS(CH_2)_2S^iPr\}]$ .....  | 5  |
| Data for $[(WCl_4)_2\{PhS(CH_2)_2SPh\}]$ .....      | 6  |
| Data for $[WCl_4(SMe_2)]$ .....                     | 7  |
| Data for $[WCl_4(SeMe_2)]$ .....                    | 8  |
| Data for $[WCl_3\{MeS(CH_2)_2SMe\}]$ .....          | 9  |
| Data for $[WCl_3\{^iPrS(CH_2)_2S^iPr\}]$ .....      | 10 |
| Data for $[(WOCl_4)_2\{^iPrS(CH_2)_2S^iPr\}]$ ..... | 10 |
| Data for $[(WOCl_4)_2\{PhS(CH_2)_2SPh\}]$ .....     | 11 |
| Data for $[WOCl_4(SMe_2)]$ .....                    | 12 |
| Crystallographic parameters .....                   | 13 |

**Data for  $[(WCl_4)_2\{MeS(CH_2)_2SMe\}]$**

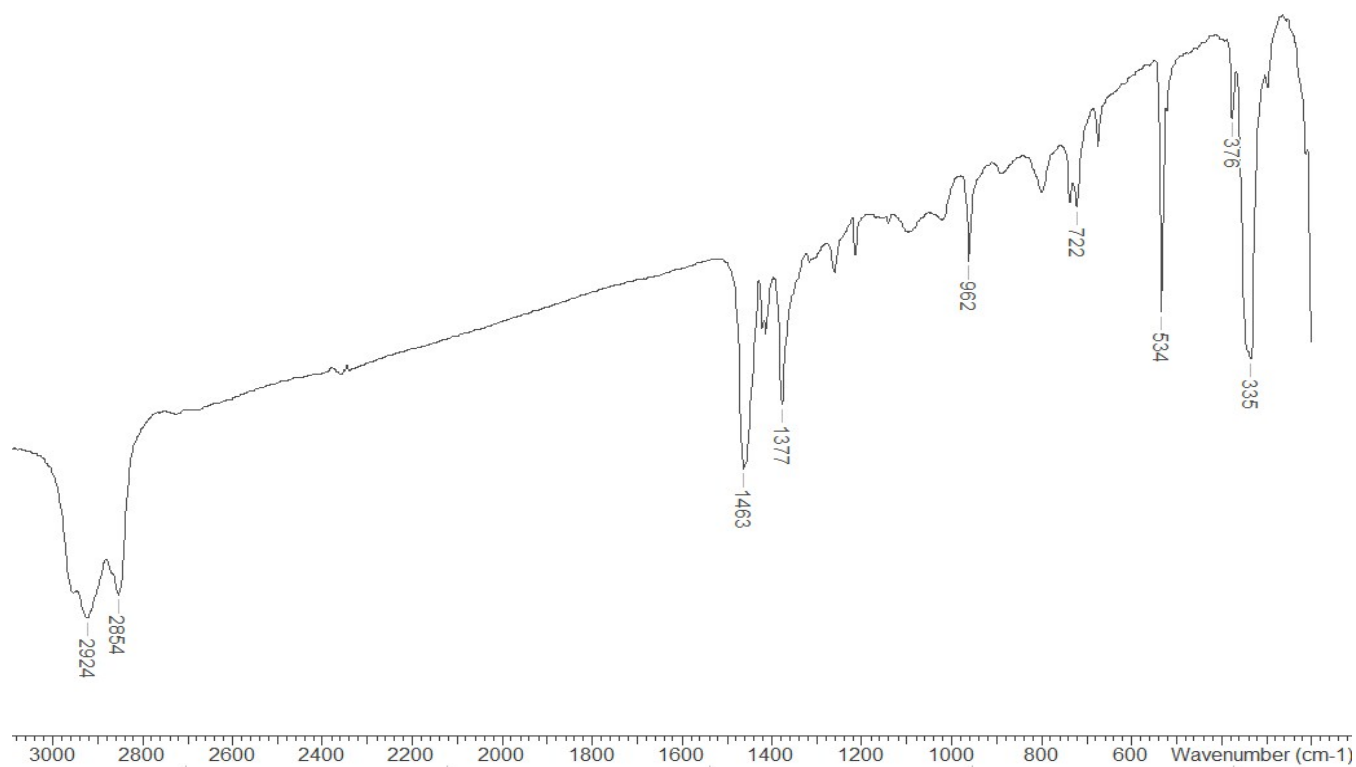

Figure 1: IR spectrum of  $[(WCl_4)_2\{MeS(CH_2)_2SMe\}]$  (Nujol).

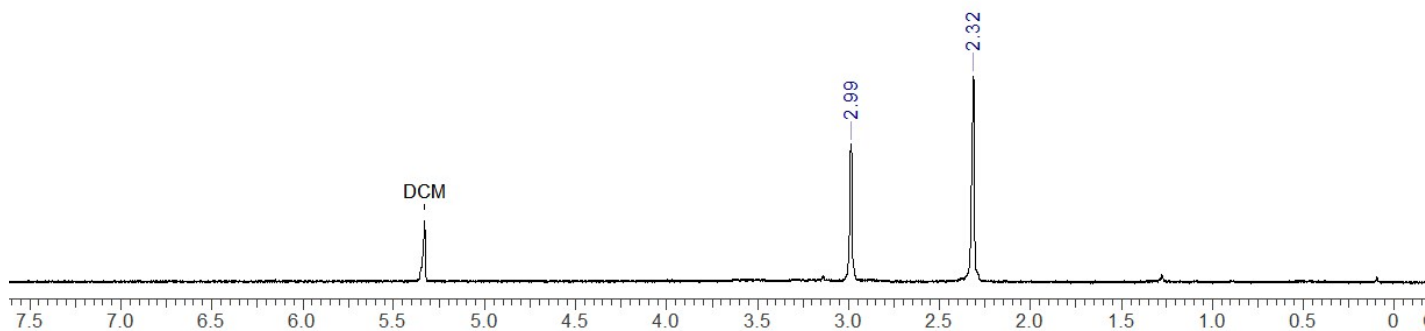

Figure 2: <sup>1</sup>H NMR spectrum of  $[(WCl_4)_2\{MeS(CH_2)_2SMe\}]$  in  $CD_2Cl_2$ .

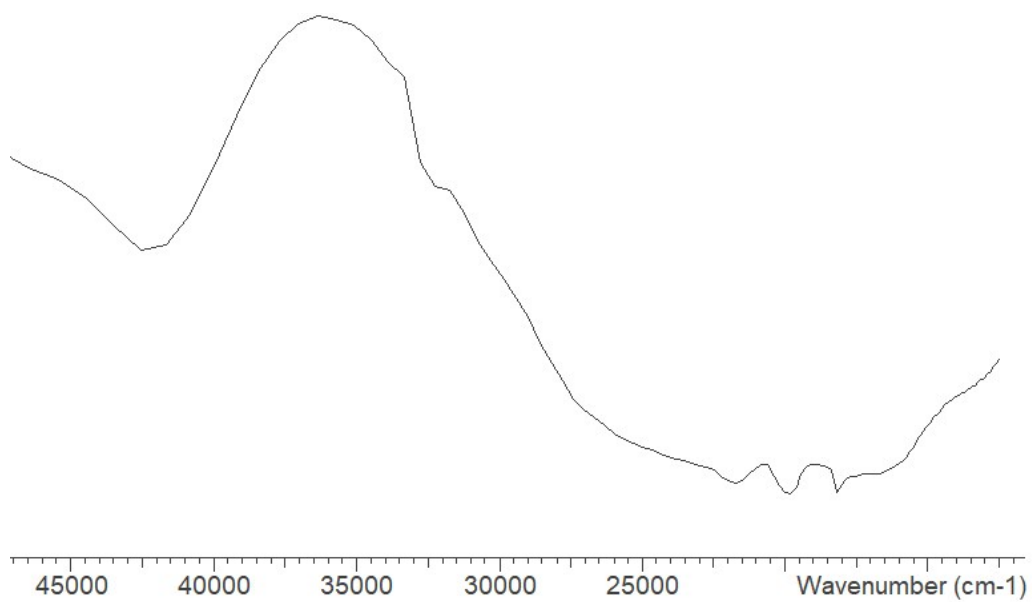

Figure 3: UV/Vis spectrum (diffuse reflectance) for  $[(WCl_4)_2\{MeS(CH_2)_2SMe\}]$ .

**Data for  $[(WCl_4)_2\{MeS(CH_2)_3SMe\}]$**

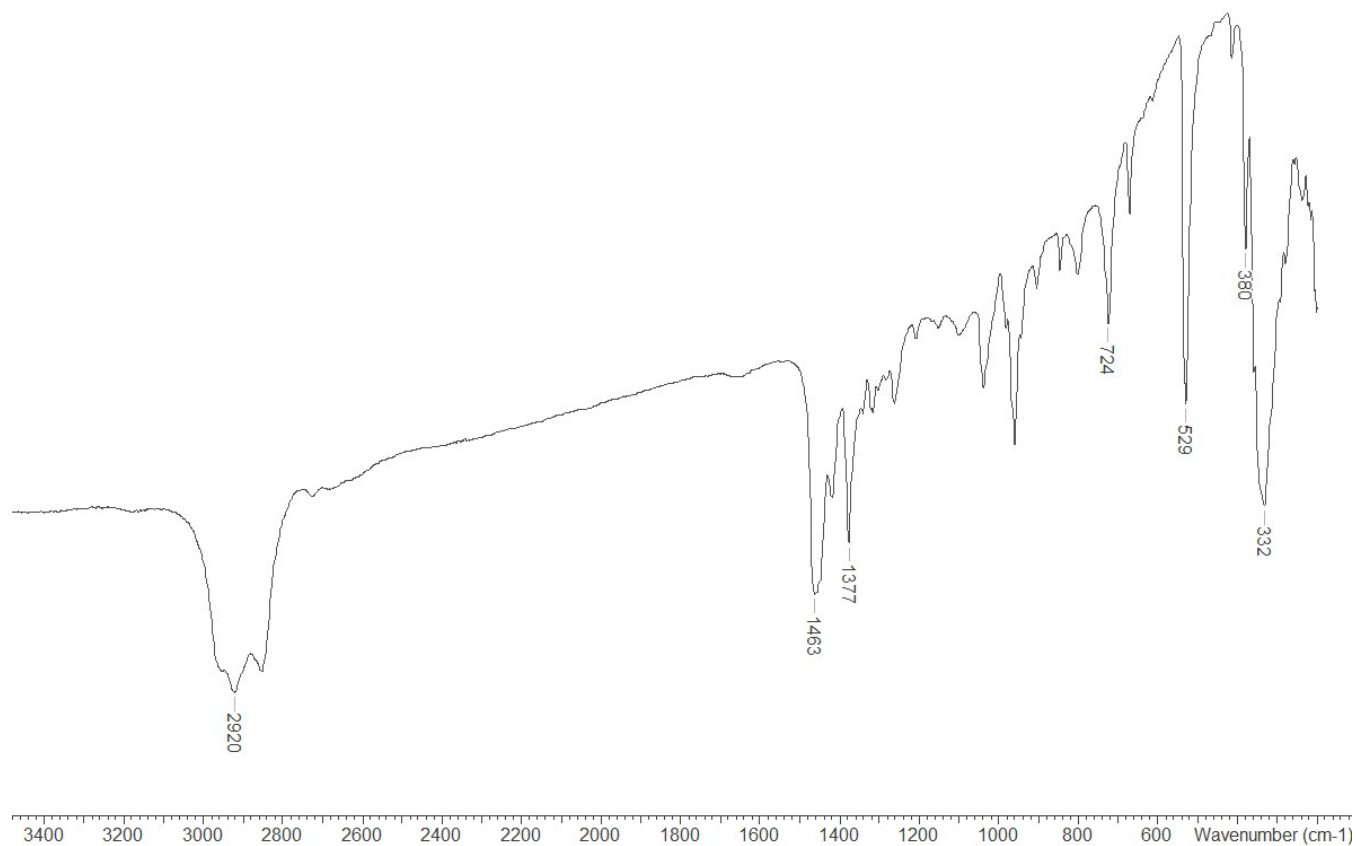

Figure 4: IR spectrum of  $[(WCl_4)_2\{MeS(CH_2)_3SMe\}]$  (Nujol).

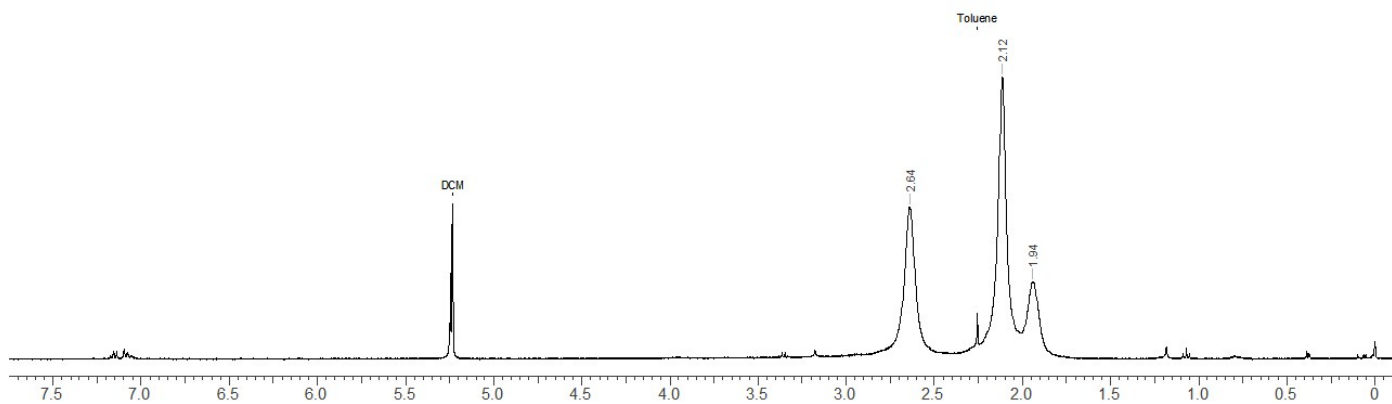

Figure 5: <sup>1</sup>H NMR spectrum of  $[(WCl_4)_2\{MeS(CH_2)_3SMe\}]$  in  $CD_2Cl_2$

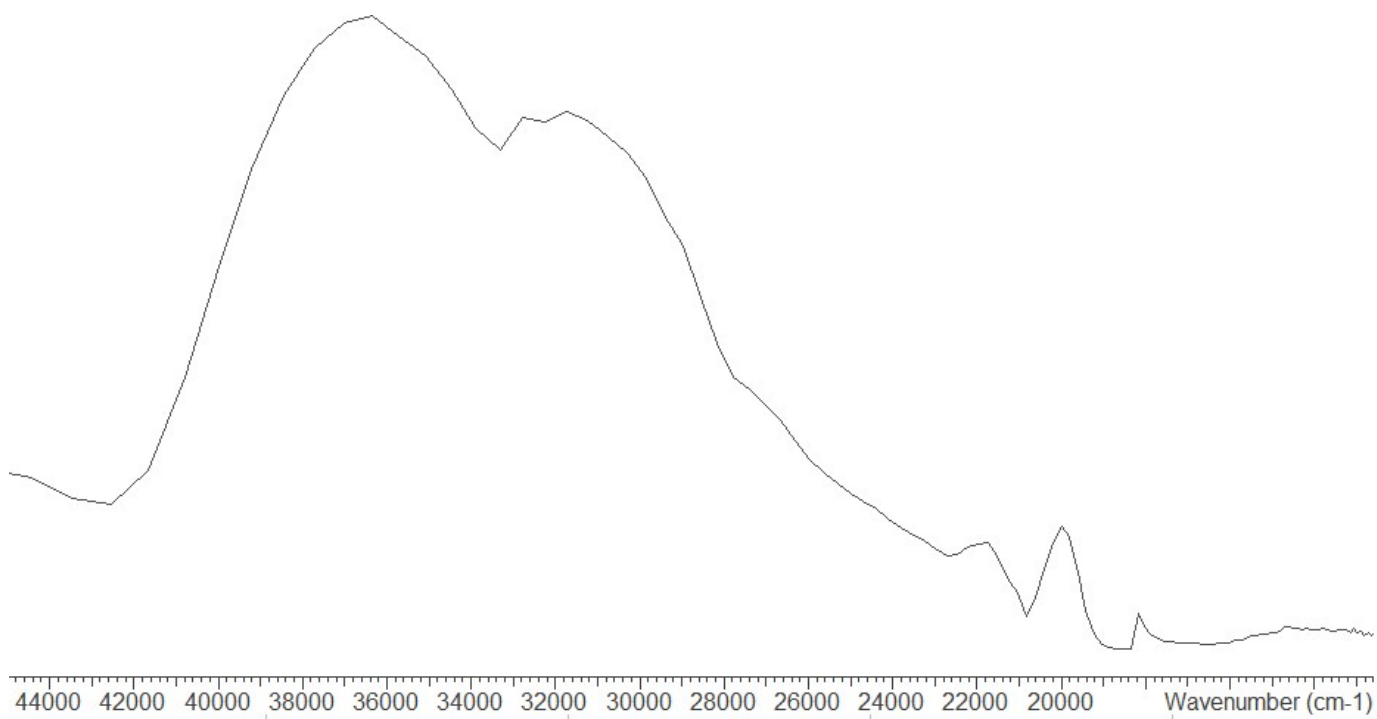

Figure 6: UV/Vis spectrum (diffuse reflectance) for  $[(WCl_4)_2\{MeS(CH_2)_3SMe\}]$ .

Data for  $[(WCl_4)_2\{^iPrS(CH_2)_2S^iPr\}]$

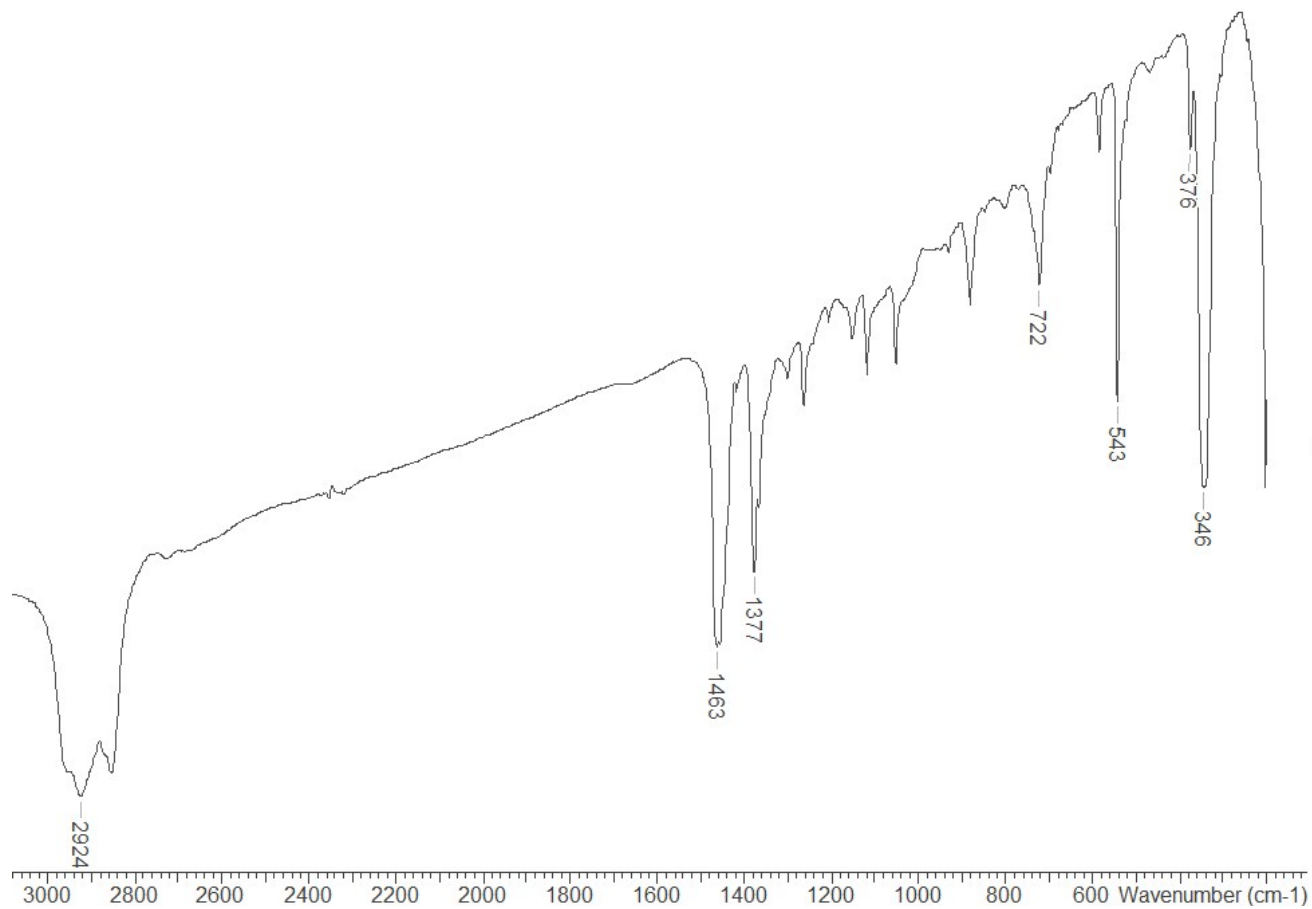

Figure 7: IR spectrum of  $[(WCl_4)_2\{^iPrS(CH_2)_2S^iPr\}]$  (Nujol).

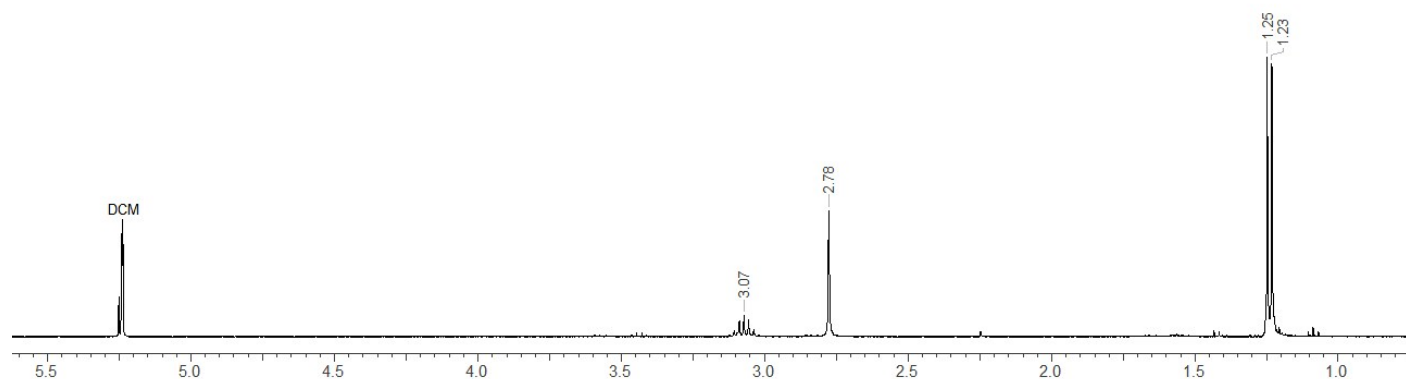

Figure 8: <sup>1</sup>H NMR spectrum of  $[(WCl_4)_2\{^iPrS(CH_2)_2S^iPr\}]$  in  $CD_2Cl_2$

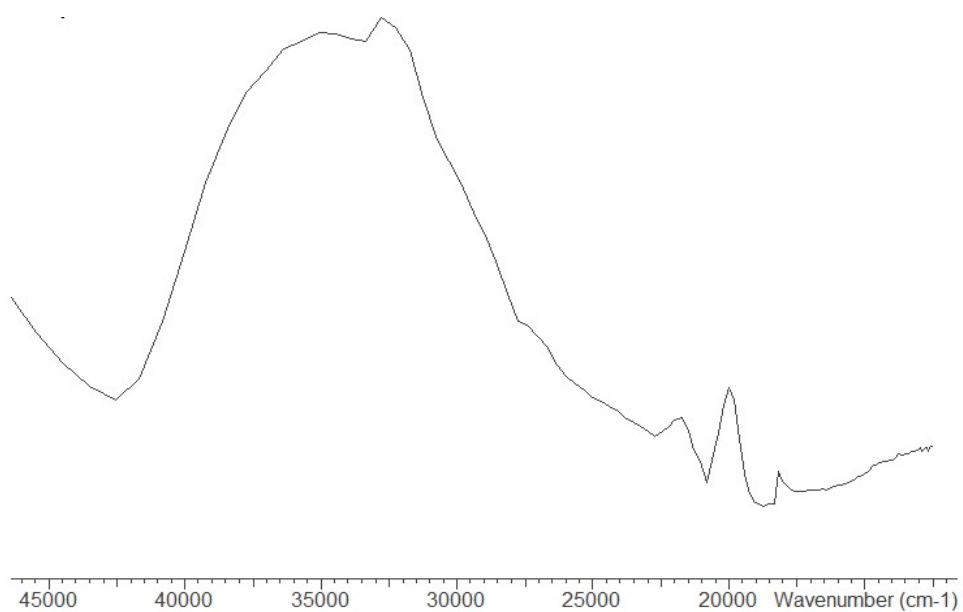

Figure 9: UV/Vis spectrum (diffuse reflectance) for  $[(WCl_4)_2(PrS(CH_2)_2SPr)]$ .

**Data for  $[(WCl_4)_2\{PhS(CH_2)_2SPh\}]$**

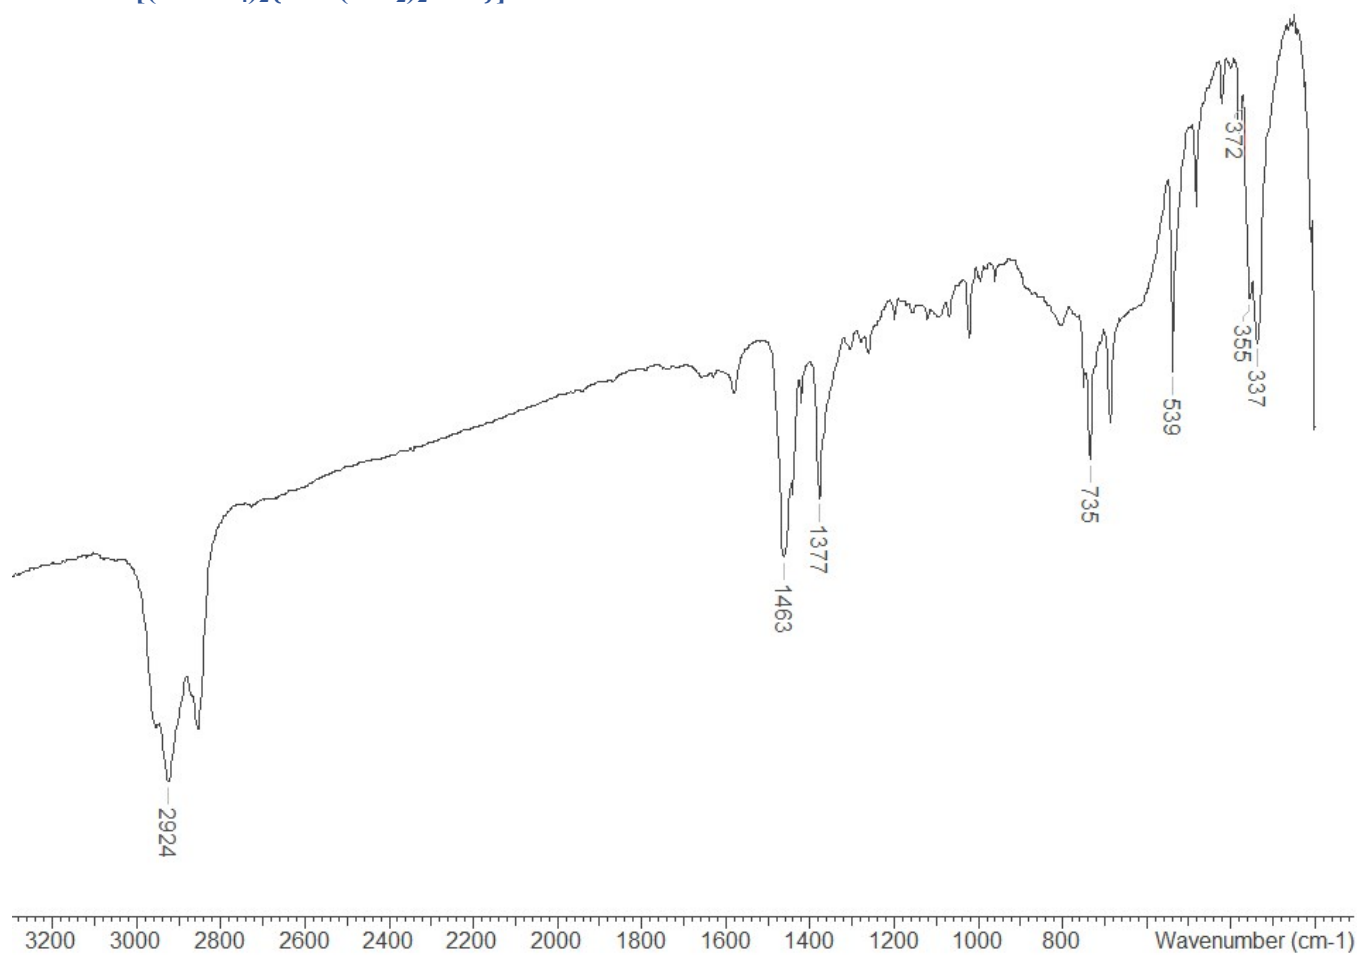

Figure 10: IR spectrum of  $[(WCl_4)_2\{PhS(CH_2)_2SPh\}]$  (Nujol).

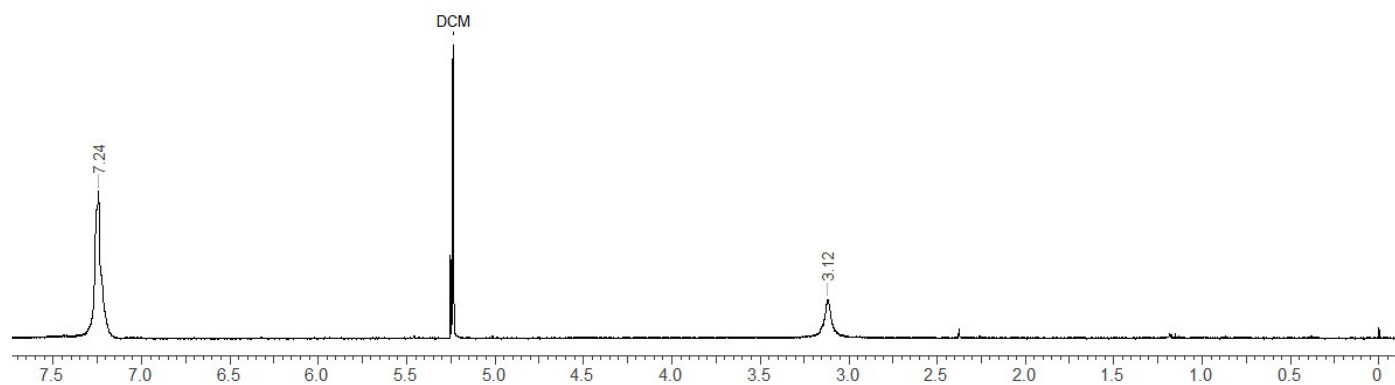

Figure 11:  $^1\text{H}$  NMR spectrum of  $[(\text{WCl}_4)_2\{\text{PhS}(\text{CH}_2)_3\text{SPh}\}]$  in  $\text{CD}_2\text{Cl}_2$

### Data for $[\text{WCl}_4(\text{SMe}_2)]$

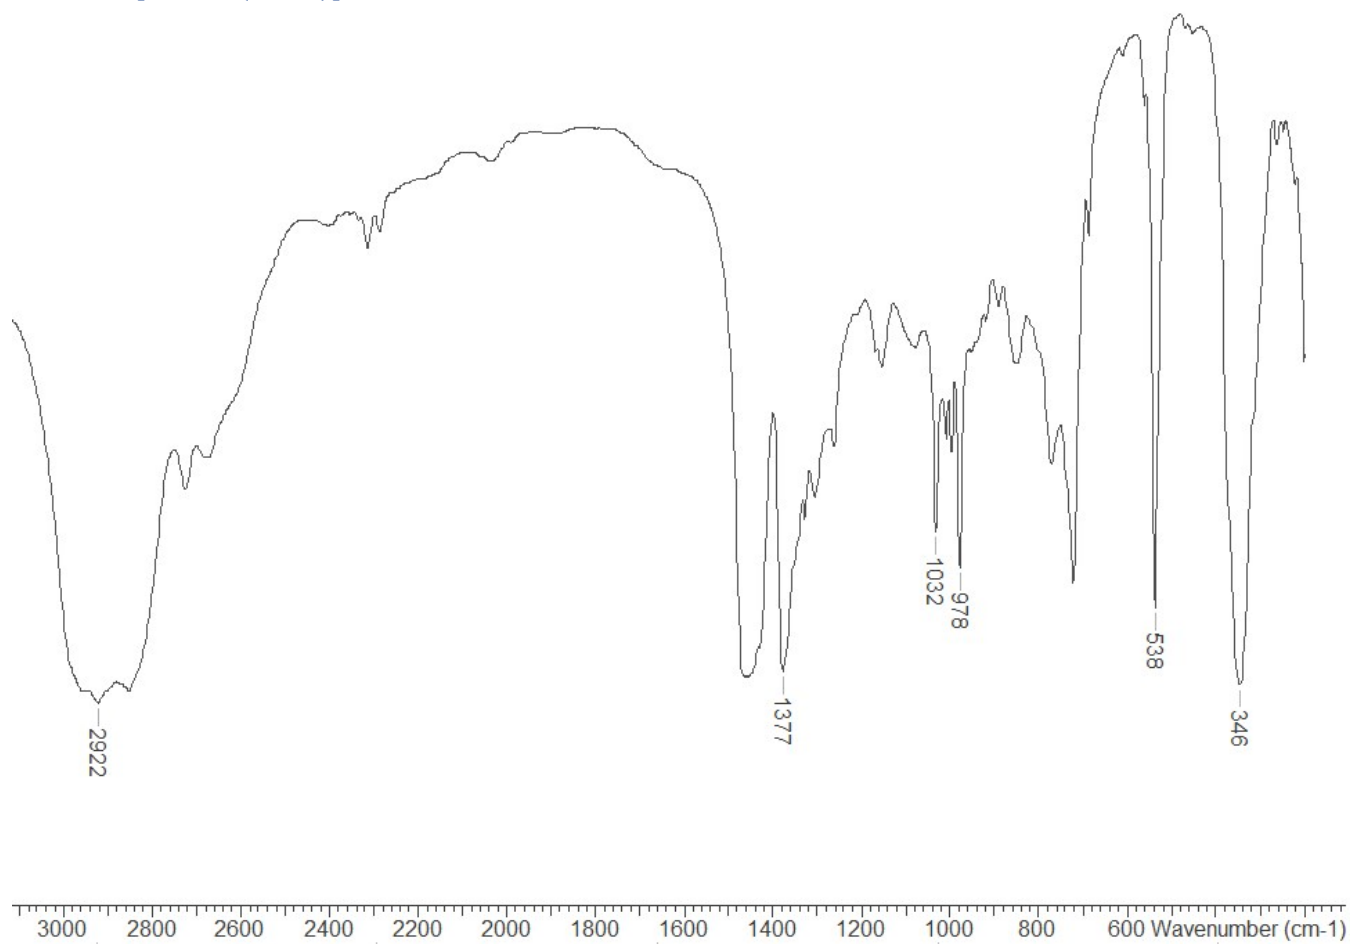

Figure 12: IR spectrum of  $[\text{WCl}_4(\text{SMe}_2)]$  (Nujol).

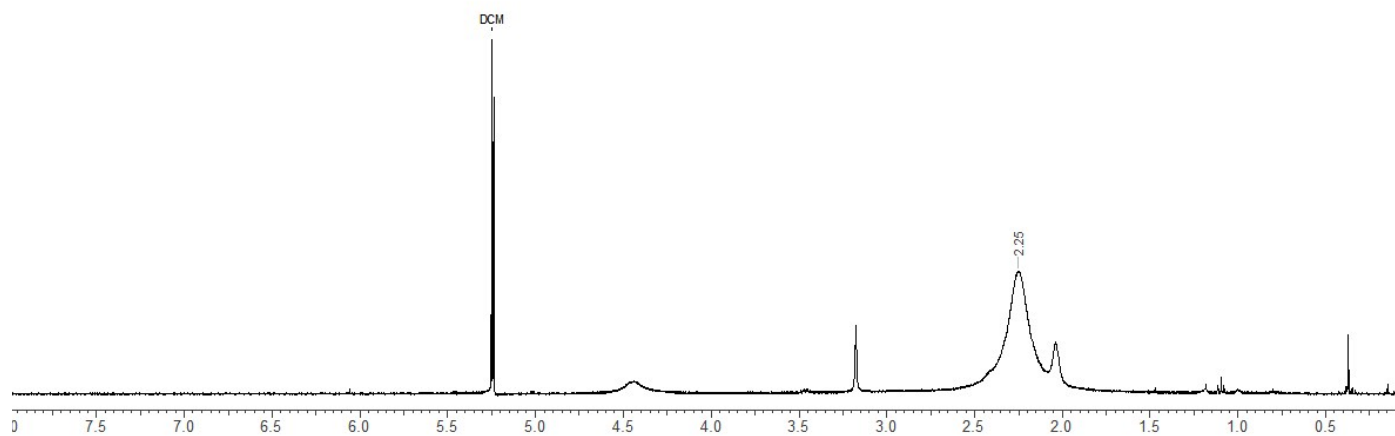

Figure 13:  $^1\text{H}$  NMR spectrum of  $[\text{WCl}_4(\text{SMe}_2)]$  in  $\text{CD}_2\text{Cl}_2$ .

### Data for $[\text{WCl}_4(\text{SeMe}_2)]$

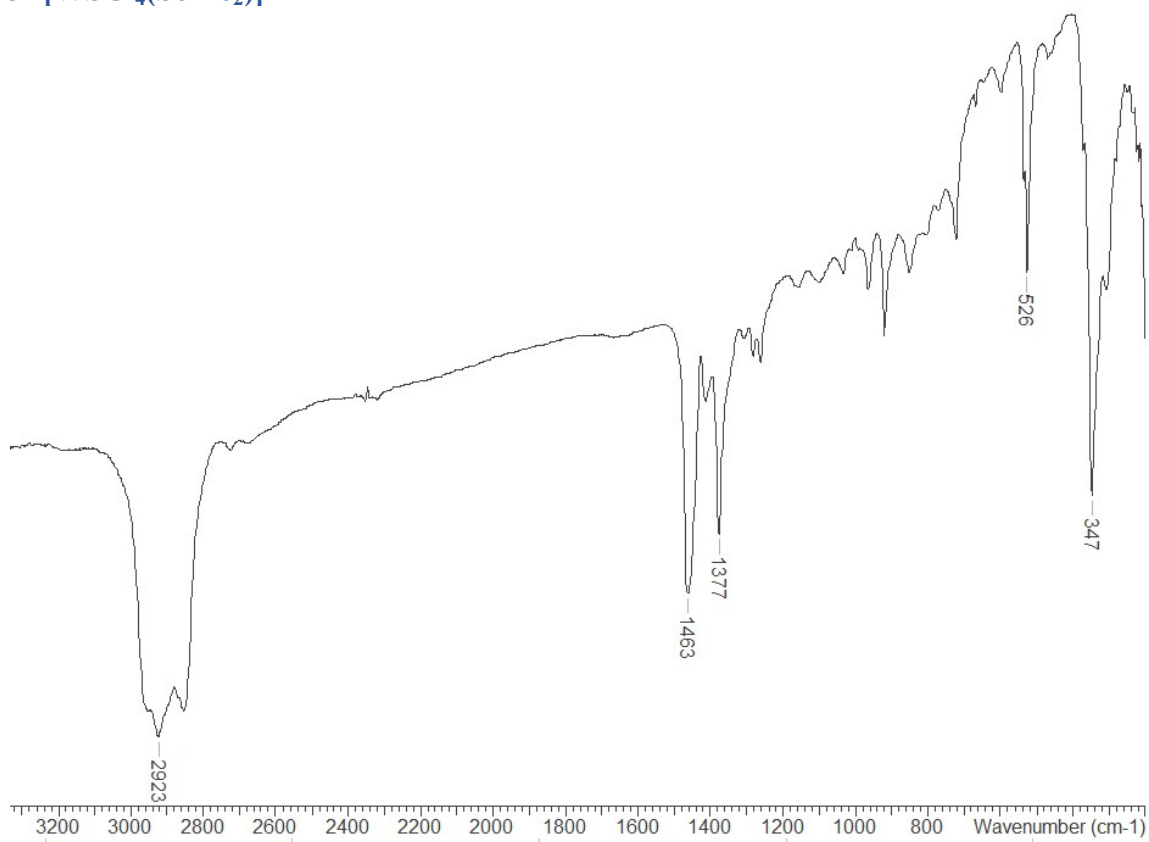

Figure 14: IR spectrum of  $[\text{WCl}_4(\text{SeMe}_2)]$  (Nujol).



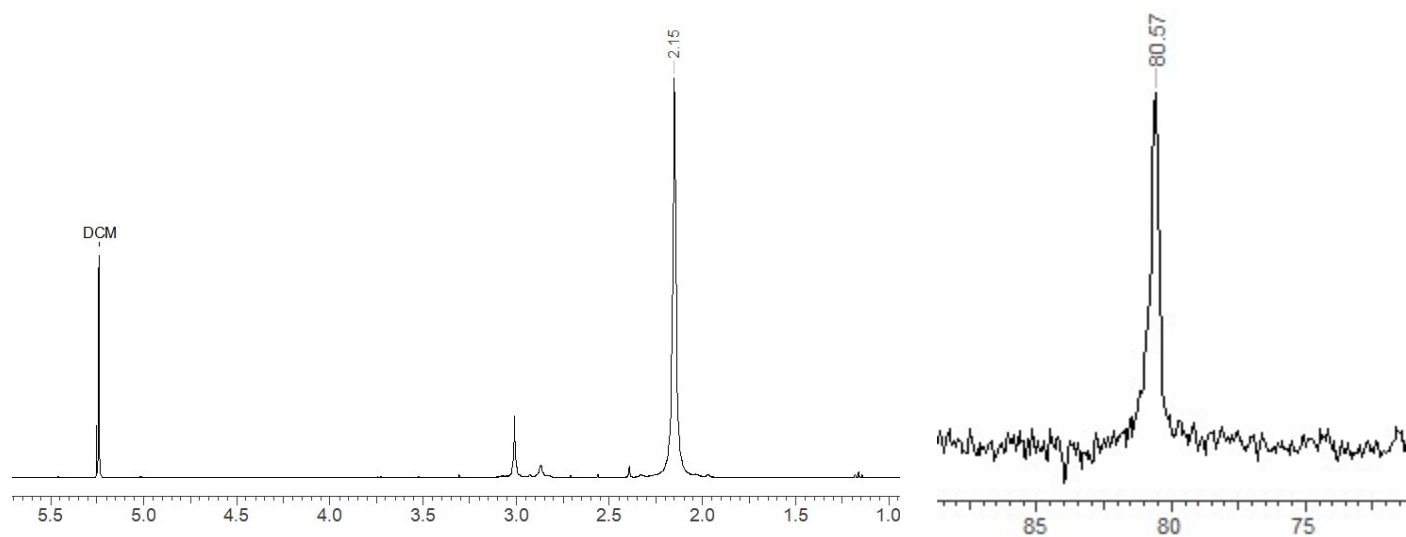

Figure 15:  $^1\text{H}$  NMR spectrum of  $[\text{WCl}_4(\text{SeMe}_2)]$  in  $\text{CD}_2\text{Cl}_2$  (left) and  $^{77}\text{Se}\{^1\text{H}\}$  NMR spectrum of  $[\text{WCl}_4(\text{SeMe}_2)]$  in  $\text{CD}_2\text{Cl}_2$  at  $-90^\circ\text{C}$  (right).

### Data for $[\text{WCl}_3\{\text{MeS}(\text{CH}_2)_2\text{SMe}\}]$

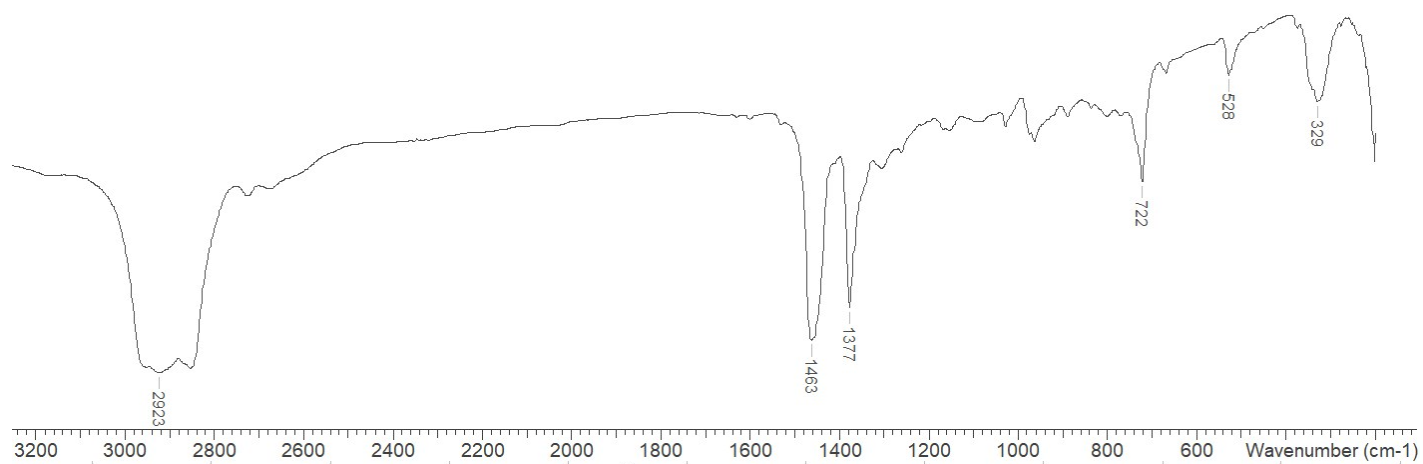

Figure 16: IR spectrum of  $[\text{WCl}_3\{\text{MeS}(\text{CH}_2)_2\text{SMe}\}]$  (Nujol).

**Data for  $[\text{WCl}_3\{\text{iPrS}(\text{CH}_2)_2\text{Si}^i\text{Pr}\}]$**

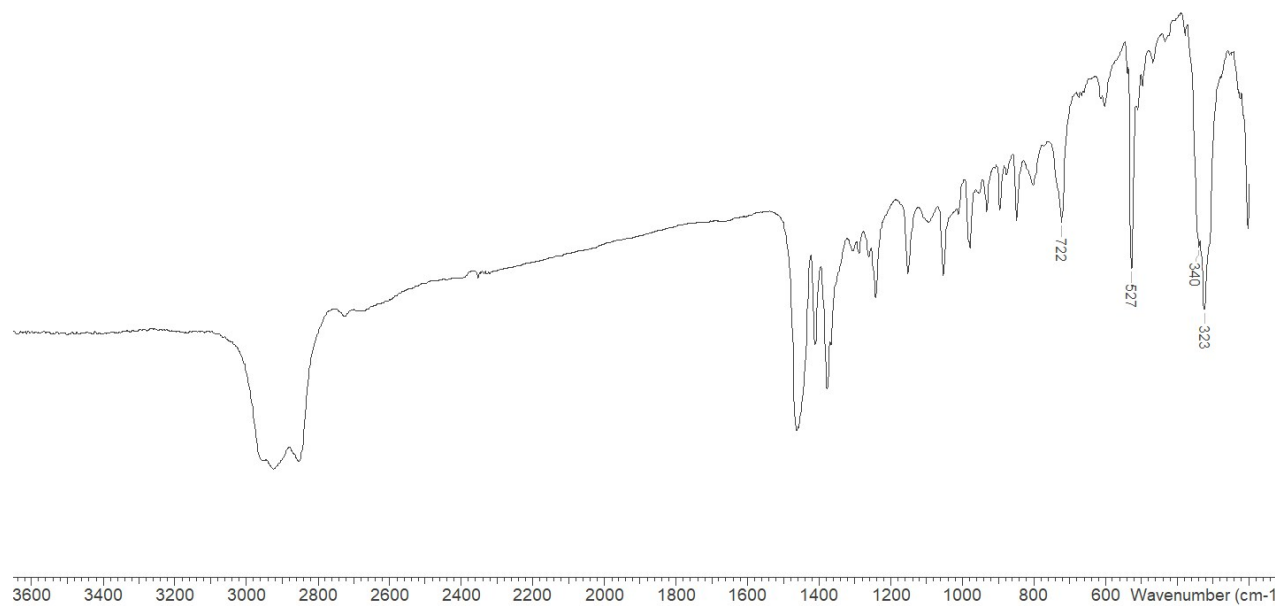

Figure 17: IR spectrum of  $[\text{WCl}_3\{\text{iPrS}(\text{CH}_2)_2\text{Si}^i\text{Pr}\}]$  (Nujol).

**Data for  $[(\text{WOCl}_4)_2\{\text{iPrS}(\text{CH}_2)_2\text{Si}^i\text{Pr}\}]$**

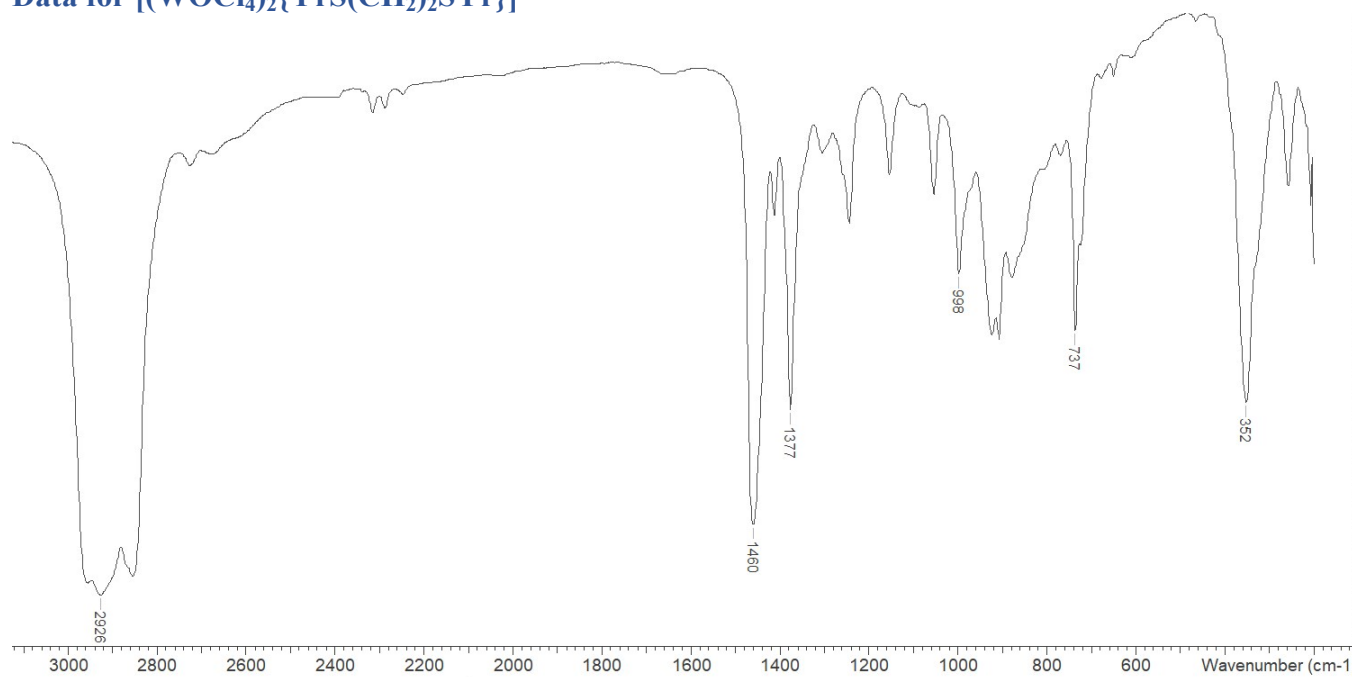

Figure 18: IR spectrum of  $[(\text{WOCl}_4)_2\{\text{iPrS}(\text{CH}_2)_2\text{Si}^i\text{Pr}\}]$  (Nujol).

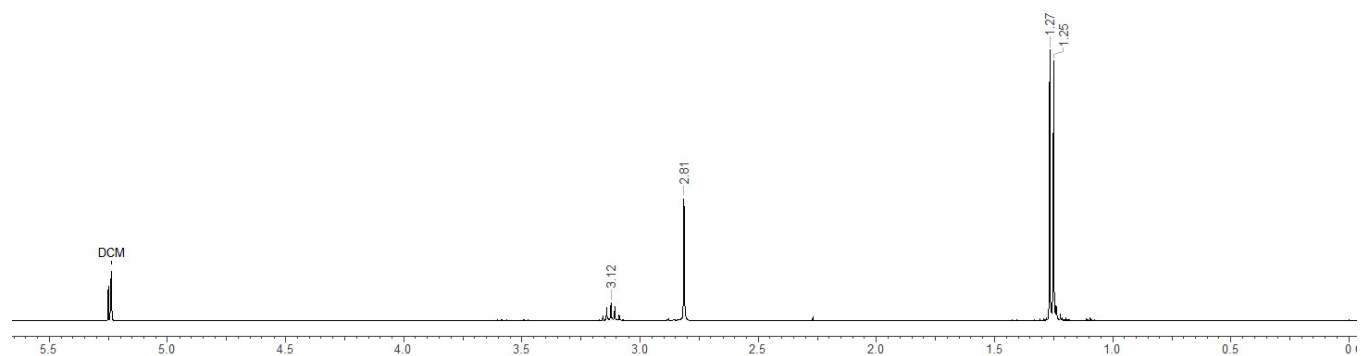

Figure 19:  $^1\text{H}$  NMR spectrum of  $[(\text{WOCl}_4)_2\{\text{PrS}(\text{CH}_2)_2\text{SPr}\}]$  in  $\text{CD}_2\text{Cl}_2$

### Data for $[(\text{WOCl}_4)_2\{\text{PhS}(\text{CH}_2)_2\text{SPh}\}]$

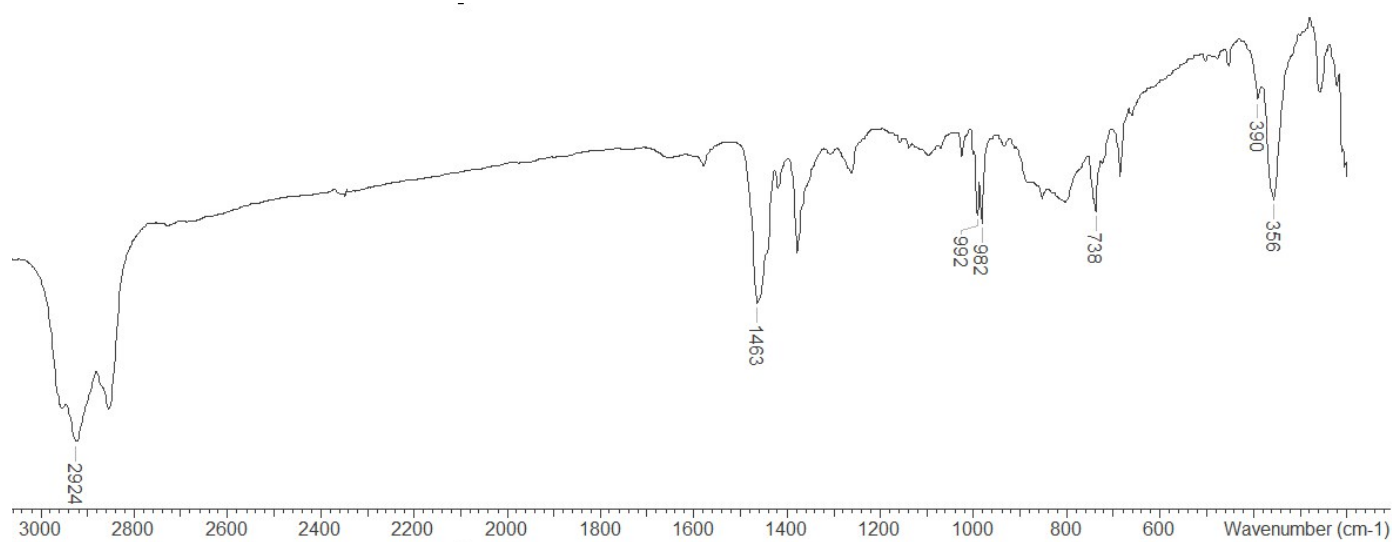

Figure 20: IR spectrum of  $[(\text{WOCl}_4)_2\{\text{PhS}(\text{CH}_2)_2\text{SPh}\}]$  (Nujol).

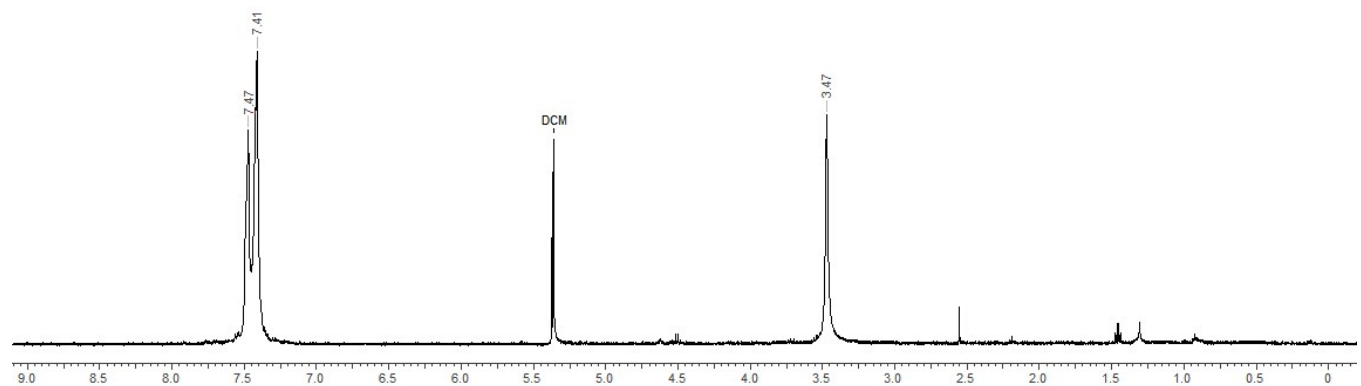

Figure 21:  $^1\text{H}$  NMR spectrum of  $[(\text{WOCl}_4)_2\{\text{PhS}(\text{CH}_2)_2\text{SPh}\}]$  in  $\text{CD}_2\text{Cl}_2$

Data for  $[\text{WOCl}_4(\text{SMe}_2)]$

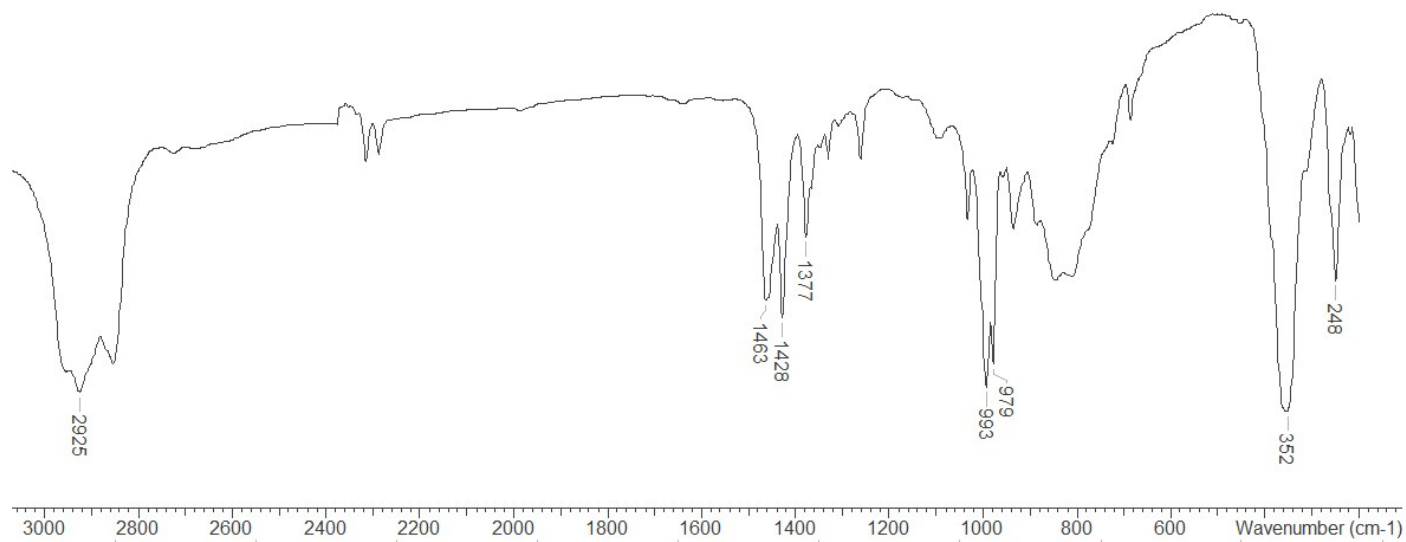

Figure 22: IR spectrum of  $[\text{WOCl}_4(\text{SMe}_2)]$  (Nujol).

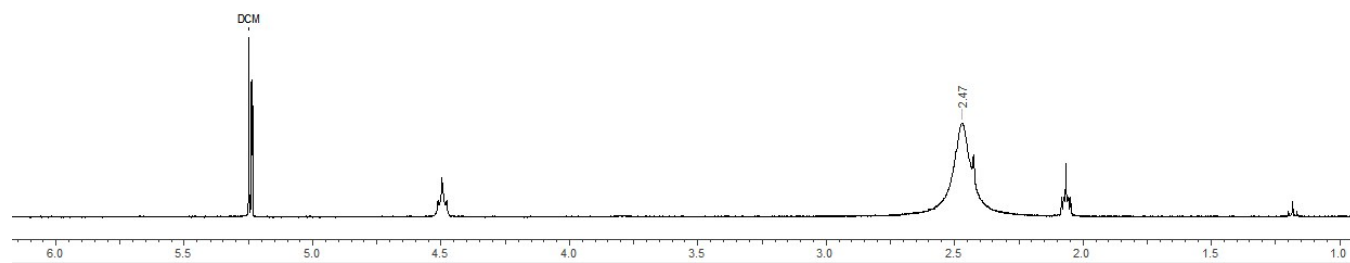

Figure 23: <sup>1</sup>H NMR spectrum of  $[\text{WOCl}_4(\text{SMe}_2)]$  in  $\text{CD}_2\text{Cl}_2$ .

## Crystallographic parameters

Table 1: X-ray crystallographic data

| Compound                                | $[(\text{W}\text{S}\text{Cl}_4)_2\{\text{PhS}(\text{CH}_2)_2\text{SPh}\}]$ | $[(\text{W}\text{S}\text{Cl}_4)_2\{\text{MeS}(\text{CH}_2)_2\text{SMe}\}]$ | $[(\text{W}\text{S}\text{Cl}_4)_2\{\text{PrS}(\text{CH}_2)_2\text{S}^i\text{Pr}\}]$ |
|-----------------------------------------|----------------------------------------------------------------------------|----------------------------------------------------------------------------|-------------------------------------------------------------------------------------|
| Formula                                 | $\text{C}_{14}\text{H}_{14}\text{Cl}_8\text{S}_2\text{W}_2$                | $\text{C}_4\text{H}_{10}\text{Cl}_8\text{S}_4\text{W}_2$                   | $\text{C}_8\text{H}_{18}\text{Cl}_8\text{S}_2\text{W}_2$                            |
| M                                       | 961.79                                                                     | 837.66                                                                     | 893.76                                                                              |
| Crystal system                          | monoclinic                                                                 | monoclinic                                                                 | monoclinic                                                                          |
| Space group (no)                        | $\text{P}2_1/\text{n}$ (14)                                                | $\text{P}2_1/\text{c}$ (14)                                                | $\text{P}2_1/\text{c}$ (14)                                                         |
| a/Å                                     | 10.5790(2)                                                                 | 7.6849(2)                                                                  | 10.7903(2)                                                                          |
| b/Å                                     | 13.9272(3)                                                                 | 10.5079(3)                                                                 | 8.89710(10)                                                                         |
| c/Å                                     | 17.2182(4)                                                                 | 11.8240(4)                                                                 | 12.1898(2)                                                                          |
| $\alpha/^\circ$                         | 90                                                                         | 90                                                                         | 90                                                                                  |
| $\beta/^\circ$                          | 96.368(2)                                                                  | 91.882(3)                                                                  | 106.732(2)                                                                          |
| $\gamma/^\circ$                         | 90                                                                         | 90                                                                         | 90                                                                                  |
| U/Å <sup>3</sup>                        | 2521.21(9)                                                                 | 954.30(5)                                                                  | 1120.70(3)                                                                          |
| Z                                       | 4                                                                          | 2                                                                          | 2                                                                                   |
| $\mu(\text{Mo-K}\alpha)/\text{mm}^{-1}$ | 10.300                                                                     | 13.581                                                                     | 11.574                                                                              |
| F(000)                                  | 1784                                                                       | 764                                                                        | 828                                                                                 |
| Total Reflns.                           | 17788                                                                      | 13938                                                                      | 18750                                                                               |
| $R_{\text{int}}$                        | 0.070                                                                      | 0.141                                                                      | 0.061                                                                               |
| Unique Reflns.                          | 6811                                                                       | 1864                                                                       | 2199                                                                                |
| Parameters/restraints                   | 253, 0                                                                     | 83, 0                                                                      | 102, 0                                                                              |
| GOF                                     | 0.968                                                                      | 1.113                                                                      | 1.180                                                                               |
| $R_1, wR_2(I > 2\sigma I)$              | 0.042, 0.071                                                               | 0.057, 0.148                                                               | 0.039, 0.087                                                                        |
| $R_1, wR_2(\text{all data})$            | 0.063, 0.082                                                               | 0.060, 0.152                                                               | 0.041, 0.088                                                                        |

<sup>a</sup> common data: wavelength (Mo-K $\alpha$ ) = 0.71073 Å;  $\theta(\text{max}) = 27.5^\circ$ ; <sup>b</sup>  $R_1 = \Sigma||\text{Fo}|-|\text{Fc}||/\Sigma|\text{Fo}|$ ;  $wR_2 = [\Sigma w(\text{Fo}^2 - \text{Fc}^2)^2/\Sigma w\text{Fo}^4]^{1/2}$

| Compound                                    | [(WSeCl <sub>4</sub> ) <sub>2</sub><br>{MeS(CH <sub>2</sub> ) <sub>3</sub> SMe}] | [WOCl <sub>3</sub><br>{MeS(CH <sub>2</sub> ) <sub>2</sub> SMe}]  | [WOCl <sub>3</sub><br>{MeS(CH <sub>2</sub> ) <sub>3</sub> SMe}]  | [WSeCl <sub>3</sub><br>{MeS(CH <sub>2</sub> ) <sub>2</sub> SMe}] |
|---------------------------------------------|----------------------------------------------------------------------------------|------------------------------------------------------------------|------------------------------------------------------------------|------------------------------------------------------------------|
| Formula                                     | C <sub>5</sub> H <sub>12</sub> Cl <sub>8</sub> S <sub>2</sub> W <sub>2</sub>     | C <sub>4</sub> H <sub>10</sub> Cl <sub>3</sub> OS <sub>2</sub> W | C <sub>5</sub> H <sub>12</sub> Cl <sub>3</sub> OS <sub>2</sub> W | C <sub>4</sub> H <sub>10</sub> Cl <sub>3</sub> S <sub>3</sub> W  |
| M                                           | 851.69                                                                           | 428.44                                                           | 442.47                                                           | 444.50                                                           |
| Crystal system                              | triclinic                                                                        | triclinic                                                        | triclinic                                                        | monoclinic                                                       |
| Space group (no)                            | P-1 (2)                                                                          | P1 (1)                                                           | P-1 (2)                                                          | P2 <sub>1</sub> /n (14)                                          |
| a/Å                                         | 6.6665(2)                                                                        | 6.7317(3)                                                        | 6.7576(4)                                                        | 6.8758(1)                                                        |
| b/Å                                         | 11.1479(2)                                                                       | 6.9581(3)                                                        | 7.3941(4)                                                        | 13.2588(2)                                                       |
| c/Å                                         | 13.8916(3)                                                                       | 7.1904(3)                                                        | 12.4200(5)                                                       | 12.5782(2)                                                       |
| α/°                                         | 101.979(2)                                                                       | 108.981(4)                                                       | 78.514(4)                                                        | 90                                                               |
| β/°                                         | 100.011(2)                                                                       | 98.845(4)                                                        | 81.724(4)                                                        | 94.541(2)                                                        |
| γ/°                                         | 95.717(2)                                                                        | 114.330(4)                                                       | 72.508(5)                                                        | 90                                                               |
| U/Å <sup>3</sup>                            | 984.61(4)                                                                        | 273.54(2)                                                        | 577.68(5)                                                        | 1143.09(3)                                                       |
| Z                                           | 2                                                                                | 1                                                                | 2                                                                | 4                                                                |
| μ(Mo-Kα)/mm <sup>-1</sup>                   | 13.166                                                                           | 11.619                                                           | 11.008                                                           | 11.296                                                           |
| F(000)                                      | 780                                                                              | 199                                                              | 414                                                              | 828                                                              |
| Total Reflns.                               | 15275                                                                            | 5239                                                             | 15495                                                            | 30189                                                            |
| R <sub>int</sub>                            | 0.039                                                                            | 0.056                                                            | 0.069                                                            | 0.026                                                            |
| Unique Reflns.                              | 5051                                                                             | 2880                                                             | 3459                                                             | 3609                                                             |
| Parameters/restraints                       | 174, 0                                                                           | 102, 3                                                           | 111, 0                                                           | 111, 0                                                           |
| GOF                                         | 1.177                                                                            | 1.041                                                            | 1.097                                                            | 1.085                                                            |
| R <sub>1</sub> , wR <sub>2</sub> (I>2σI)    | 0.050, 0.118                                                                     | 0.045, 0.104                                                     | 0.050, 0.117                                                     | 0.039, 0.075                                                     |
| R <sub>1</sub> , wR <sub>2</sub> (all data) | 0.058, 0.128                                                                     | 0.046, 0.105                                                     | 0.059, 0.121                                                     | 0.043, 0.176                                                     |

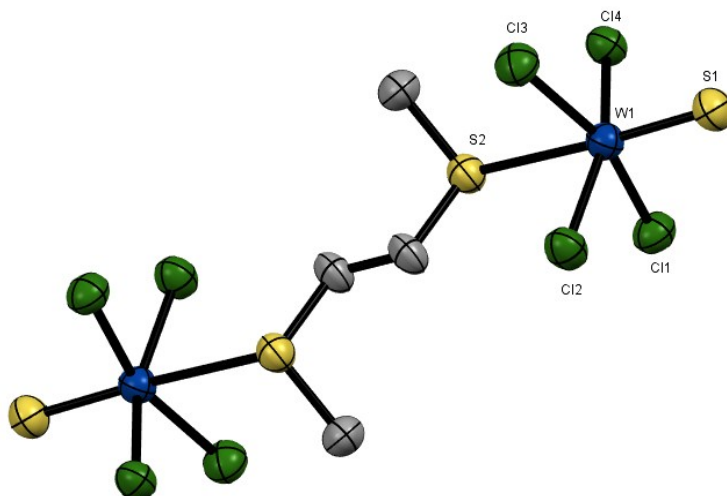

Figure S1 The structure of  $[(WCl_4)_2\{MeS(CH_2)_2SMe\}]$  showing the atom numbering scheme. H atoms are omitted for clarity. Selected bond lengths (Å) and angles ( $^\circ$ ) are: W1–Cl2 = 2.301(3), W1–Cl1 2.307(2), W1–Cl4 = 2.311(3), W1–Cl3 = 2.295(3), W1–S1 = 2.095(2), W1–S2 = 2.835(2), S1–W1–Cl(1-4) = 97.84(10) – 101.05(10), S2–W1–Cl(1-4) = 75.01(9) – 86.05(9).

The structure here reported in  $P2_1/c$  is very similar to the literature report<sup>16</sup> (in  $P2_1/n$ ), but is of higher precision.
